# Supplementary material for: Zona Pellucida like Domain Protein 1 (ZPLD1) Polymerization Is Regulated by Two Distinguished Hydrophobic Motifs
Source: MDPI journal article supplement (doi:10.3390/ijms232213894), 2022-11-11
Supplement: s1 [file s1]

**Supplementary Materials:**

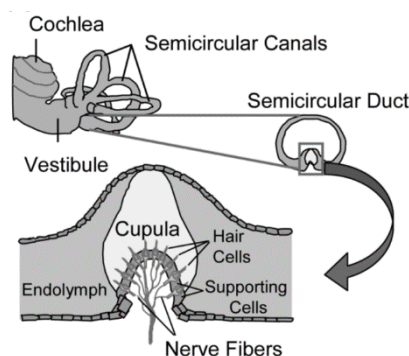

**Supplementary Figure S1.** Schematic representation of the localization of the cupula in the (human) inner ear [1]. Figure reused with permission from Ref. [1].

CLUSTAL 2.1 multiple sequence alignment

[illegible]

**Supplementary Figure S2.** Visual multiple sequence alignment using CLUSTAL W (<https://www.genome.jp/tools-bin/clustalw>) [27]. Zebrafish (accession A0A0R4ITH5 ), salmon (accession ACN10635, ~86.4% identity) and human (accession AAH31261, ~71.5% identity) ZPLD1 amino acid sequences are highly conserved.

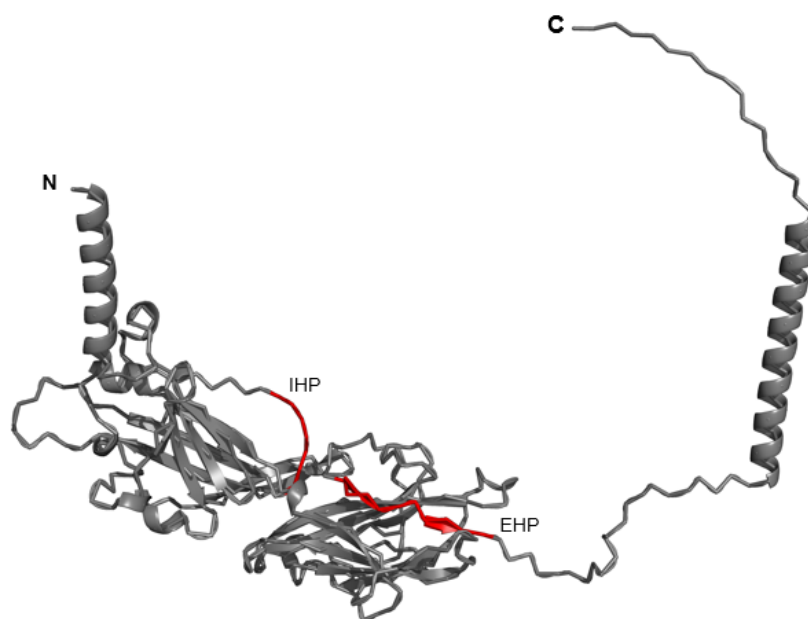

**Supplementary Figure S3.** Visualization of predicted structure of zebrafish ZPLD1 (accession A0A0R4ITH5). Model prediction by AlphaFold (AlphaFold DB version 2022-06-01) [33,34]. Putative IHP and EHP are marked in red.

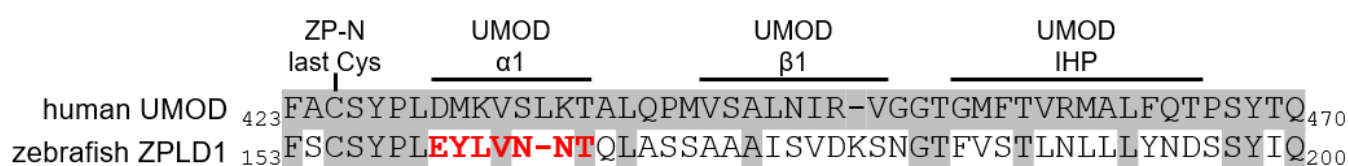

**Supplementary Figure S4.** Sequence comparison of the interdomain linker sequences of zebrafish ZPLD1 (accession A0A0R4ITH5) and human Uromodulin (accession P07911). The structured rigid linker region of Uromodulin consists of an  $\alpha$ -helix ( $\alpha 1$ ), a beta-strand ( $\beta 1$ ) and the consecutive IHP [21]. Alignment reveals that Schaeffer's proposed model for the prediction of the IHP as well as the relevant hydrophobic sequence we identified for ZPLD1 (marked in red) might correspond to the  $\alpha 1$ -helix rather than the internal hydrophobic patch.

TAGTTATTAATAGTAATCAATTACGGGGTCATTAGTTCATAGCCCATATATGGAGTTCGCGGTTACATAAAGTTACGGTAAATGGCCCGCCTGGCTGACCGCCCAACGAC  
CCCCGCCCATTTGACGTCAATAATGACGTATGTTCCCATAGTAACGCCAATAGGGACTTTCCATTGACGTCAATGGGTGGAGTATTTACGGTAAACTGCCCCACTTGGCAG  
TACATCAAGTGTATCATATGCCAAGTAGCCCCCTATTGACGTCAATGACGGTAAATGGCCCGCCTGGCATTATGCCCAGTACATGACCTTATGGGACTTTCTACTTTG  
GCAGTACATCTACGTATTAGTCATCGCTATTACCATGGTGTATGCGGTTTTTGGCAGTACATCAATGGGCGTGGATAGCGGTTTGACTCACGGGGATTTCGAAGTCTCCAC  
CCCATTTGACGTCAATGGGAGTTTGTTTTGGCACCAAAATCAACGGGACTTTCCAAAATGTCGTAACAACCTCCGCCCATTTGACGCAAAATGGGCGGTAGGCGTGTACGGT  
GGGAGGTCTATATAAGCAGAGCTGGTTTAGTGAACCGTCAGATCCGCTAGCCACC**ATGGAACGTTTGTGTGTGATTCTCTTTGCTTGTAAAGTAAAACCTTTTCATAGCGAAAT**  
**GCTCAATTCAATGGGTTCAACTGTGATGCCAACTTCCACAGCCGCTTCCCCGCCGAGCGGGACATCAGTGTGTATTGTGGAGTTCAAACCATAACTCTGAAGATTAATT**  
**TTTGGCCCGGTGCTTTTTTCTGGCTACACTGACACTGACCTGGCACTGAATGGGCGTCACGGGGATGCCCACTGCAGAGGCTTCATCAACAACAACACGTTCCCCACGGT**  
**TGTGCTGTTTACGATCAGTCTCAACACTCTGGAGTCTTGCAGAACTCACTGGTGGTCTCTACGGCTCATGGGCCAACCGCTATGGGAATCTTTCCCTGGTCCAGATT**  
**GGGAATATAGCAGGATACATTGACACTCCGGATCCCCGACTGTATCAGTTACCTACCAGGACTGCTTTACAAGTTCAGTTGTAGCTACCCACTGGAATACCTGGTCA**  
**ACAACACACAGCTTGCTTCGTCGGCCGCAGCGATATCAGTGAAGGACAGTAATGGTACTTTTGTGTAGCACGCTCAATTTGCTTCTATACAACGACTCCTCATACATTCA**  
**GAACCTCGCCATCCCAATGTCTGGACTTACTCTGAAGACGCGAGTGTTCGCGCTGTAAAAGCCACCAACCTAGATAGGAGGTGGAACGTTCTGATGGACTACTGTTA**

ACCACTCCCTCTGGAAATCCTAATGATGAGCTGCGATATGATCTTTTCTTTGGATGCGATAAGGACCCACAGACGACAGTGTGTTGAGAACGGGAAGAGCCAGATGGGTC  
GCTTCTCCTTTGAGGTGTTTCGCTTTGTCAAGCACAAAAACCAGAAAAATGTCGACTGTTTTTCTGCACTGCGTGACCAAGCTGTGTGCTGCTGATGACTGCCCCATGCT  
CCTGCCCATCTGCGGTAAGAGGAAGAAAAGGGATGTGTGAGAAAGAACGGTGGTGCCTCAGACAATGCAGTTATAACCCTGCGACCCATCATCACCCGAAGTGATGAA  
ACTCCCAGTAATATATCCCAACTAGCGCAGTTAAACGGCCCTCCATTCAAATGAATTCAGTGACGAGCGCTTTAATTTCTGCCATCGCGATCCTCGCCGTTATGAGCA  
TGTGTTTTCTCATCTTGTCTATGTGCTGCTGAGGGGAAAAACAGACGCCAGCAACATCTCTATCAGGATCCACACAACCCAGCGTTCAGCCTCGAGCTCAAGCTTCGAAT  
TCTGCAGTCGACGGTACC CGGGCCCGGGATCCACCGTTCGCCACCATGGTGAGCAAGGGCGAGGAGCTGTTACCGGGGTGGTGCCATCCTGGTCGAGCTGGACGGC  
GACGTAACCGGCCACAAGTTCAGCGTGTCCGGCGAGGGCGAGGGCGATGCCACCTACGGCAAGCTGACCTGAAGTTCATCTGCACCACCGGCAAGCTGCCCCGTGCCCT  
GGCCACCCCTCGTGACCACCTGACCTACGGCGTGCACTGCTTCAGCCGCTACCCCGACCACATGAAGCAGCACGACTTCTTCAAGTCCGCCATGCCGAAGGCTACGT  
CCAGGAGCGCACCATCTTCTTCAAGGACGACGGCAACTACAAGACCCGCGCCGAGGTGAAGTTCGAGGGCGACACCCCTGGTGAACCGCATCGAGCTGAAGGGCATCGAC  
TTCAAGGAGGACGGCAACATCCTGGGGCACAAGCTGGAGTACAACACAAGCCACAACGTCTATATCATGGCCGACAAGCAGAAGAAGCGCATCAAGGTGAACCTCA  
AGATCCGCCACAACATCGAGGACGGCAGCGTGAGCTCGCCGACCACTACCAGCAGAACACCCCATCGGCGACGCCCCGTGCTGCTGCCCGACAACCACTACCTGAG  
CACCCAGTCCGCCCTGAGCAAAGACCCCAACGAGAAGCGCGATCACATGGTCTGCTGGAGTTCGTGACCGCCGCGGGATCACTCTCGGCATGGACGAGCTGTACAAG  
TCCGGACTCAGATCTATGGAGACCCCGTCCAGCGGGCGGCCACCCGACGCGGGCGCAGGCCAGCTCCACTCCGCTGTGCGCCACCCGCATCACCCGGCTGCAGGAGA  
AGGAGGAGGATCCACCGGATCTAGATAACTGATCATAATCAGCCATACCACATTTGTAGAGGTTTTACTTGCTTTAAAAAACCTCCACACCTCCCCCTGAACCTGAAA  
CATAAAATGAATGCAATTGTTGTTGTTAACTTGTATTATTCGACGTTATAATGGTTACAAATAAAGCAATAGCATCACAAATTTACAAATAAAGCATTTTTTTTCACTGC  
ATTCTAGTTGTGTTGTTGCCAACTCATCAATGTATCTTAACGCGTAAATGTAAAGCGTTAATATTTTGTAAATTCGCGTTAAATTTTTGTAAATCAGCTCATTTTT  
TTAACCAATAGGCCGAAATCGGCAAAATCCCTTATAAATCAAAAGAATAGACCGAGATAGGGTTGAGTGTGTTCCAGTTTGAACAAGAGTCCACTATTAAAGAACGT  
GGACTCCAACGTCAAAGGGCGAAAAACCGTCTATCAGGGCGATGGCCACTACGTGAACCATCACCTAATCAAGTTTTTTGGGGTCGAGGTGCCGTAAAGCACTAAAT  
CGGAACCTTAAAGGGAGCCCCGATTTAGAGCTTGACGGGGAAGCCGCGCAACGTGGCGAGAAAGGAAGGAAGAAAGCGAAAGGAGCGGGCGCTAGGGCGCTGGCAA  
GTGTAGCGGTACGCTGCGCGTAACCACCACACCCGCGCGCTTAATGCGCCGCTACAGGGCGCGTCAGGTGGCACTTTTCGGGGAAATGTGCGCGGAACCCCTATTTG  
TTTATTTTCTAAATACATTCAAATATGTATCCGCTCATGAGACAATAACCTTGATAAATGCTTCAATAATATTGAAAAAGGAAGAGTCCTGAGGCGGAAGAACCAGC  
TGTTGAATGTGTGCAGTTAGGGTGTGGAAAGTCCCAGGCTCCCCAGCAGGCAGAAGTATGCAAAGCATGCATCTCAATTAGTCAGCAACCAGGTGTGGAAAGTCCCC  
AGGCTCCCCAGCAGGCAGAAGTATGCAAAGCATGCATCTCAATTAGTCAGCAACCATAGTCCCGCCCCCTAACTCCGCCCATCCCGCCCCCTAACTCCGCCAGTTCGGCC  
CATTTCTCCGCCCATGGCTGACTAATTTTTTTTTATTTATGCAGAGGCCGAGGCCGCTCGGCCTCTGAGCTATTCCAGAAGTAGTGAGGAGGCTTTTTTGGAGGCCCTAG  
GCTTTTGCAAAGATCGATCAAGAGACAGGATGAGGATCGTTTCGCATGATTGAACAAGATGGATTGCACGCAGGTCTCCGGCCGCTTGGGTGGAGAGGCTATTCCGGCT  
ATGACTGGGCACAACAGACAATCGGCTGCTCTGATGCCGCCGTGTCCGGCTGTGAGCGCAGGGCGCCCGGTTCTTTTTGTCAAGACCGACCTGTCCGGTGCCCTGAA  
TGAATGCAAGACGAGGCAGCGGGCTATCGTGCTGGCCACGACGGCGTTCCTTGCGCAGCTGTGCTCGACGTGTGCTACTGAAGCGGGAAGGGACTGGCTGCTATTG  
GGCGAAGTGCCGGGGCAGGATCTCCTGTCTCTCACCTTGCTCCTGCCGAGAAAGTATCCATCATGGCTGATGCAATGCGGCGGCTGCATACGCTTGATCCGGCTACCT  
GCCCATTCGACCACCAAGCGAAACATCGCATCGAGCGAGCAGTACTCGGATGGAAGCCGGTCTTGTGATCAGGATGATCTGGACGAAGAGCATCAGGGGCTCGCGCC  
AGCCGAATGTTTCGCGAGGCTCAAGGCGAGCATGCCGACGGCGAGGATCTCGTCTGACCATGGCGATGCCTGCTTGCCGAATATCATGGTGGAAAAATGGCCGCTTT  
TCTGGATTCTGACTGTGGCCGCTGGGTGTGGCGGACCGCTATCAGGACATAGCGTTGGCTACCCGTGATATTGCTGAAGAGCTTGCGGGCGAATGGGCTGACCGCT  
TCCTCGTGCTTTACGGTATCGCCGCTCCCGATTGCGAGCGCATCGCCTTCTATCGCCTTCTTGACGAGTCTTCTGAGCGGGACTCTGGGGTTGCAATGACCGACCAA  
GCGACGCCCAACCTGCCATCAGGAGATTTCGATTCCACC GCCGCTTCTATGAAAGGTTGGGCTTCGGAATCGTTTTCCGGGACGCCGGCTGGATGATCTCCAGCGCG  
GGGATCTCATGCTGGAGTTCTTCGCCCACCCCTAGGGGGAGGCTAACTGAAACACGGAAGGAGACAATACCGGAAGGAACCCGCGCTATGACGGCAATAAAAAGACAGAA  
TAAACGCACGGTGTGGGTGTTTGTTCATAAACCGGGGTTTCGGTCCCAGGGCTGGCACTCTGTGATACCCACCGAGACCCCATTTGGGGCAATACGCCCGCGTT  
TCTTCCTTTTCCCCACCCCAACCCCAAGTTTCGGGTGAAGGCCAGGGCTCGCAGCCAACGTTCGGGGCGCAGGCCCTGCCATAGCCTCAGGTACTCATATATACTTT  
AGATTGATTTAAACTTCATTTTTTAATTTAAAGGATCTAGGTGAAGATCCTTTTTGATAATCTCATGACCAAAATCCCTTAACGTGAGTTTTCGTTCCACTGAGCGTC  
AGACCCCGTAGAAAAATCAAGGATCTTCTTGAGATCCTTTTTTTCTGCGCGTAATCTGCTGCTTGCAAACAAAAAACACCGCTACCAGCGGTGGTTTGTGTTGCCG  
GATCAAGAGCTACCAACTCTTTTTCCGAAGGTAACCTGGCTTCAGCAGAGCGCAGATACCAAACTACTGTCTTCTAGTGAGCCGTAGTTAGGCCACCACTTCAAGAACT  
CTGTAGCACCGCTACATACCTCGCTCTGCTAATCCTGTTACCACTGGCTGCTGCCAGTGGCGATAAGTCGTGTCTTACCGGGTTGGACTCAAGACGATAGTTACCGGA  
TAAGGCGCAGCGTCCGGCTGAACGGGGGTTTCGTGCACACAGCCAGCTTGAGCGCAACGACCTACCCGAAGTGAATACCTACAGCGTGAGCTATGAGAAAGCGCC  
ACGCTTCCCGAAGGGAGAAAGCGGACAGGTATCCGGTAAGCGGCAGGGTCGGAACAGGAGAGCGCACGAGGGAGCTTCCAGGGGAAACGCCTGGTATCTTTATAGTC

CTGTCGGGTTTCGCCACCTCTGACTTGAGCGTCGATTTTGTGATGCTCGTCAGGGGGCGGAGCCTATGGAAAAACGCCAGCAACGCGGCCTTTTACGGTTCCTGGC  
CTTTTGCTGGCCTTTTGCTCACATGTTCTTTCCTGCGTTATCCCTGATTCTGTGGATAACCGTATTACCGCCATGCAT

**Supplementary Figure S5.** Full sequence of initially ordered expression vector (accession A0A0R4ITH5). The zebrafish ZPLD1 sequence is indicated in bold letters.

**Supplementary Table S1.** Primers (5′-3′) used to generate ZPLD1 expression constructs

| Mutation                                                             | Primer                                                                                                                           |
|----------------------------------------------------------------------|----------------------------------------------------------------------------------------------------------------------------------|
| Deletion of eGFP                                                     | Forward: CAGCCATACCACATTTGTAGAGGTTTTACTTGC<br>Reverse: TCACTCGAGGCTGAACGCTGGG                                                    |
| Insertion of the Streptavidin-tag (and corresponding Linker)         | Forward: TGGAGCCATCCGCAGTTTGAAAAAAGGAA-<br>GAAAAGGGATGTGTCAGAAAGAAGCGG<br>Reverse: AGAGCCAGAAGACTTACCGCAGATGGGCAGGAGCATGGGGC     |
| Deletion of the putative EHP                                         | Forward: AGTGATGAAACTCCCAGTAATATATCCC<br>Reverse: TGCATTGTCTGAGGCACCACCGC                                                        |
| Deletion of the putative IHP                                         | Forward: CAGCTTGCTTCGTCGGCCGCAGCG<br>Reverse: CAGTGGGTAGCTACAACCTGAACTTGTAAGCAGTCC                                               |
| Deletion of the putative TMD                                         | Forward: ATGTCGCTGCTGAGGGGAAAAACAGACG<br>Reverse: TGAATTCATTTTGAATGGAGGGCCG                                                      |
| Insertion of the N-terminal 8xHis-tag (N-His)                        | Forward: TCTTCTGGCTCTTTCAATGGGTTCAACTGTGATGCCAACTTCC<br>Reverse: ATGATGATGATGGTGATGGTGATGTTGAGCATTTCG-<br>TATGAAAGTTTTACTTACAAGC |
| Insertion of the C-terminal 8xHis-tag N-terminal of the EHP (C-His1) | Forward: CATCATCATCATGGTGGTGCCTCAGAC<br>Reverse: GTGATGGTGATGGCTTCTTTCTGACACATCCC                                                |
| Insertion of the C-terminal 8xHis-tag C-terminal of the EHP (C-His2) | Forward: CATCATCATCATAATATATCCCAACTAGCGCAG<br>Reverse: GTGATGGTGATGACTGGGAGTTTCATCACTTCG                                         |

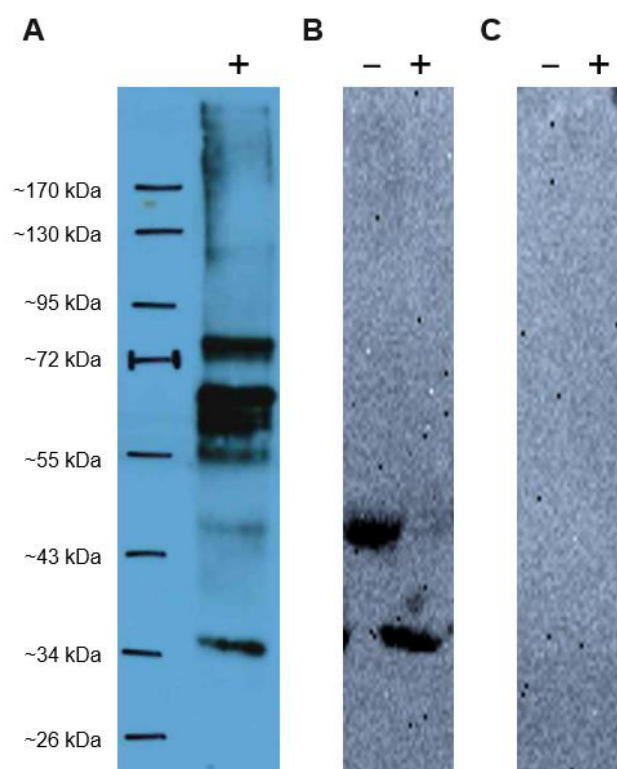

**Supplementary Figure S6.** Western blot detecting of PNGase F treated (+) as well as untreated (-) ZPLD1. The protein was purified from MDCK cell culture media. (A) Protein reduced and denatured in Laemmli buffer containing 2.5% mercaptoethanol at 96 °C for 5 min. Besides the 35 kDa monomer, higher molecular weight species can be observed. (B) Protein reduced and denatured in Laemmli buffer containing 5% mercaptoethanol at 96 °C for 15 min to obtain a higher portion of monomeric protein. (C) Control sample obtained from mock-transfected MDCK cells.

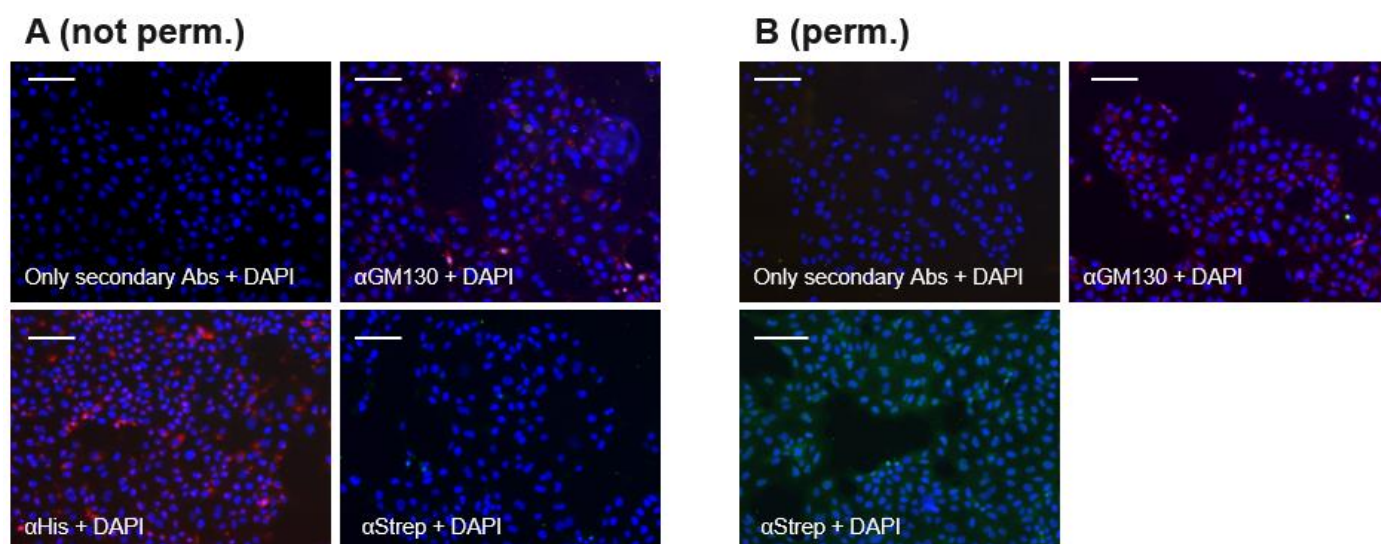

**Supplementary Figure S7.** Control immunofluorescence images of untransfected MDCK cells. Cells treated with: a mixture of all used secondary antibodies, antibodies against the Golgi marker GM130, and tag antibodies (His/Strep) (see Materials and Methods). All samples were additionally stained with DAPI. (A) Cells were not permeabilized; (B) Cells permeabilized using Triton X-100. Bar, 50  $\mu$ m.
